# Supplementary material for: Assessing the impact of Clean Air Action Plan on Air Quality Trends in Beijing Megacity using a machine learning technique
Source: Copernicus journal article supplement (doi:10.5194/acp-2019-173), 2019-02-21
Supplement: Supplementary file 1 [file acp-2019-173-supplement.pdf]

1 **SUPPORTING INFORMATION**

2

3 **Assessing the impact of Clean Air Action Plan on Air Quality Trends in Beijing Megacity**  
4 **using a machine learning technique**

5

6 Tuan V. Vu<sup>1</sup>, Zongbo Shi<sup>1,2\*</sup>, Jing Cheng<sup>3</sup>, Qiang Zhang<sup>3</sup>, Kebin He<sup>4,5</sup>, Shuxiao Wang<sup>4</sup>, Roy M. Harrison<sup>1,6\*</sup>

7

8 <sup>1</sup> Division of Environmental Health & Risk Management, School of Geography, Earth & Environmental Sciences, University of  
9 Birmingham, Birmingham B1 52TT, United Kingdom.

10 <sup>2</sup> Ministry of Education Key Laboratory for Earth System Modeling, Department of Earth System Science, Tsinghua University,  
11 Beijing 100084, China.

12 <sup>3</sup> Institute of Earth Surface System Science, Tianjin University, Tianjin, 300072, China.

13 <sup>4</sup> State Key Joint Laboratory of Environment, Simulation and Pollution Control, School of Environment, Tsinghua University,  
14 Beijing 100084, China.

15 <sup>5</sup> State Environmental Protection Key Laboratory of Sources and Control of Air Pollution Complex, Beijing 100084, China.

16 <sup>6</sup> Department of Environmental Sciences / Center of Excellence in Environmental Studies, King Abdulaziz University, PO Box  
17 80203, Jeddah, Saudi Arabia.

18

19 \* Correspondence to [r.m.harrison@bham.ac.uk](mailto:r.m.harrison@bham.ac.uk) and [z.shi@bham.ac.uk](mailto:z.shi@bham.ac.uk)

20

21 **Number of pages : 11**

22 **Number of tables : 1**

23 **Number of figures : 5**

24

25 **CONTENTS**

26 **Methods**

27 Section S1. Data collection and overview of air quality

28 Section S2. Notices, regulation and policies for air pollution control in Beijing

29 Section S3. Model performance and explanation

30

31 **Figures:** Figure S1 to Figure S5

32 Figure S1. The influence of number of trees on the model performance for PM<sub>2.5</sub>

33 Figure S2. Correlations between hourly observed and predicted data from testing data sets

34 Figure S3. Correlations between weekly observed and predicted data from both training and testing  
35 data sets

36 Figure S4. Importance of variables in the random forest model

37 Figure S5. Variable interactions between in a random forest model for PM<sub>2.5</sub>

38 Figure S6. Probability density of urban air pollutant concentrations during 2013-2017

39 Figure S7. Monthly emission inventories of air pollutants in Beijing during 2013-2017

40 Figure S8. Normalized levels of air pollutants and energy consumption

41

42 **Tables**

43 Table S1. Air Quality Standards

44

45 **Section S1. Data collection and overview of air quality**

46 Hourly air quality data for six air pollutants was collected in Beijing from 17/01/2013 to 31/12/2017  
47 across 12 national air quality monitoring stations which were classified in three categories (urban,  
48 suburban, and rural areas) based on hierarchical clustering. Specifically, PM<sub>2.5</sub> levels at urban,  
49 suburban and rural sites decreased from 89.8, 78.3, and 67.8  $\mu\text{g m}^{-3}$  in 2013 to 59.6, 54.6, and 47.8  
50  $\mu\text{g m}^{-3}$  in 2017, respectively. In 2017, 23 % of days still exceeded the NAAQS-II. A higher  
51 decrease in PM<sub>10</sub> levels by 20.2 % was found at urban sites compared to those at suburban sites  
52 (17.2 %). PM<sub>10</sub> also shows exceedances of NAAQS-II standards both for daily averages (150  $\mu\text{g m}^{-3}$ )  
53 and annual averages (70  $\mu\text{g m}^{-3}$ ). It suggests that particulate matter, especially PM<sub>2.5</sub> is still a  
54 critical air pollutant in Beijing. In 2017, SO<sub>2</sub> does not show exceedance of the NAAQS-II standards  
55 either for daily averages (150  $\mu\text{g m}^{-3}$ ) and annual averages (60  $\mu\text{g m}^{-3}$ ). For CO, only 12 days do not  
56 meet NAAQS-II standards of 4  $\mu\text{g m}^{-3}$ . In contrast, the annual average concentration of NO<sub>2</sub> in  
57 2017 was slightly higher than the NAAQS-II standard of 40  $\mu\text{g m}^{-3}$ , with 18 days exceeding the  
58 NAAQS-II standard for daily averages (80  $\mu\text{g m}^{-3}$ ).

59

60 **Section S2. Notices, regulation and policies for air pollution control in Beijing**

61 The five-year period of 2013-2017 has seen the implementation of numerous regulations and  
62 policies. The “Beijing Clean Air Action Plan 2013-2017” proposed eight key regulations including:  
63 (1) Controlling the city development intensity, population size, vehicle ownership, and  
64 environmental resources, (2) Restructuring energy by reducing coal consumption, supplying clean  
65 and green energy, and improving energy efficiency, (3) promoting public transport, implementing  
66 stricter emission standards, eliminating old vehicles and encouraging new and clean energy  
67 vehicles, (4) Optimizing industrial structure by eliminating polluting capacities, closing small  
68 polluting enterprises, building eco-industrial parks and pursuing cleaner production, (5)  
69 Strengthening treatment of air pollutants and tightening environmental protection standards, (6)  
70 Strengthening urban management and regulation enforcement, (7) Preserving ecological

71 environment by enhancing green coverage and water area, and (8) Strengthening emergency  
72 response to heavy air pollution. We collected more than 70 major notices and policies on air  
73 pollution control during from Beijing government website (<http://zhengce.beijing.gov.cn/library/>).  
74 Most important regulations were related to energy system re-structuring and vehicle emissions.

75

76 **Regulation and policies on energy system re-structuring:**

- 77 • In October 2013, the government of Huairou district enforced a policy to replace anthracite  
78 stoves from 3000 rural households, change coal heating to electricity for 1170 households,  
79 supply liquefied petroleum to the countryside for 20,000 households, construct energy-saving  
80 residential housing and implement district heating; this reduced the consumption of 47,000 tons  
81 of poor quality coal.
- 82 • In Oct 2013, the government of Shijingshan, an urban district of Beijing, planned to cut 2800  
83 tons of coal usage from coal-fired boilers in 2013, and reduce coal usage by more than 4500  
84 tons in 2014, and eliminate coal-fired boilers in 2015.
- 85 • In November 2013, Miyun government issued an action plan to “Reduce coal for clean air”  
86 with a focus on urban transformation, conversion to natural gas, replacement with high quality  
87 coal, relocation of mountain communities, conservation of household energy, and removal of  
88 illegal constructions.
- 89 • In September 2014, the China State government released an important regulation on the  
90 “Reform and upgrade Action Plan for coal energy conservation and emission reduction (2014-  
91 2020)” that requires Beijing to place strict controls upon energy efficiency. Following that  
92 Action Plan, stack gas emissions of SO<sub>2</sub>, NO<sub>x</sub>, and PM from coal-fired power plants must be  
93 limited to below 10, 35, and 50 mg m<sup>-3</sup> respectively.
- 94 • In March 2017, the Ministry of Environmental Protection issued the “2017 Air Pollution  
95 Prevention and Control Work Plan for Beijing-Tianjin-Hebei”. According to this plan, before

96 the end of October 2017, Beijing, Tianjin, Langfang and Baoding City of Hebei will become  
97 the “no-coal zone”.

98

99 **Regulations and policies on vehicle emission control:** In order to control air pollution from  
100 vehicle emissions, during 2013-2017 the city announced a series of policies and regulations  
101 focusing on the implementation of stricter standards for new vehicles and vehicle fuels, elimination  
102 of yellow-label vehicles (which do not meet basic emission standards), and promotion of public  
103 transport. Consequently, Beijing led the nation in improving the fuel quality standards by adopting  
104 the desulfurization of gasoline and diesel fuels (sulfur content <10 ppm) in 2012, three years ahead  
105 of the surrounding regions (Tianjin and Hebei) and five years before the national deadline. Major  
106 policies for air pollution from transportation management:

- 107 • In February 2013, Beijing implemented the fifth phase emission standards for new light-duty  
108 gasoline vehicles (LDVs) and heavy-duty diesel vehicles (HDVs) for public transport.
- 109 • In June 2013, another notice from the Beijing government emphasized that all heavy-duty  
110 vehicles sold and registered in Beijing must meet the national fourth-phase emission standards
- 111 • In August 2014, a notice from Beijing’s government declared that all spark ignition light  
112 vehicles must meet the national five phase standard from 1<sup>st</sup> January 2015.
- 113 • In 2014, Beijing Municipal Commission of Transport (BMCT) expanded traffic restrictions to  
114 certain vehicles, particularly yellow-label and non-local vehicles to enter the city within the  
115 sixth ring road during daytime since 2015.
- 116 • In November 2014, the governments of Yanqing and Miyun, two rural districts of Beijing,  
117 released regulations to prohibit yellow-label gasoline vehicles entering certain roads.
- 118 • In February 2015, the Beijing Municipal government issued a notice to promote elimination  
119 and replacement of old motor vehicles with an expectation of 1 million old vehicles/year  
120 phased out.

- 121 • Other policies which may have contributed to the enhancement of air quality during 2013-2017  
122 included a ban of outdoor biomass burning and improved suppression of dust discharges from  
123 construction sites.

124

125 **Section S3. Model performance and explanation**

126 **Model construction:** The input variables contain time and MET variables.

127 Time variables: day\_unix (or  $t_{\text{trend}}$ ) represents the emission trend of a pollutant; Julian\_day ( $t_{\text{JD}}$ : the  
128 day of the years) represents for the seasonal variation; weekday/weekend represents the difference  
129 of pollution between the week and weekend days.

130 MET variables: wind speed ( $\text{m s}^{-1}$ ), wind direction ( $^{\circ}$ ), temperature ( $^{\circ}\text{C}$ ), relative humidity (%), and  
131 atmospheric pressure (mbar).

132 Selected parameters in a random forest:

- 133 • Mtry=3: variables randomly sampled for splitting the decision tree
- 134 • Nodesize=3: minimum size of terminal nodes for model
- 135 • Ntree=200, the number of trees to grow. Figure S1 shows the dependence of model  
136 performance on the number of trees.

137

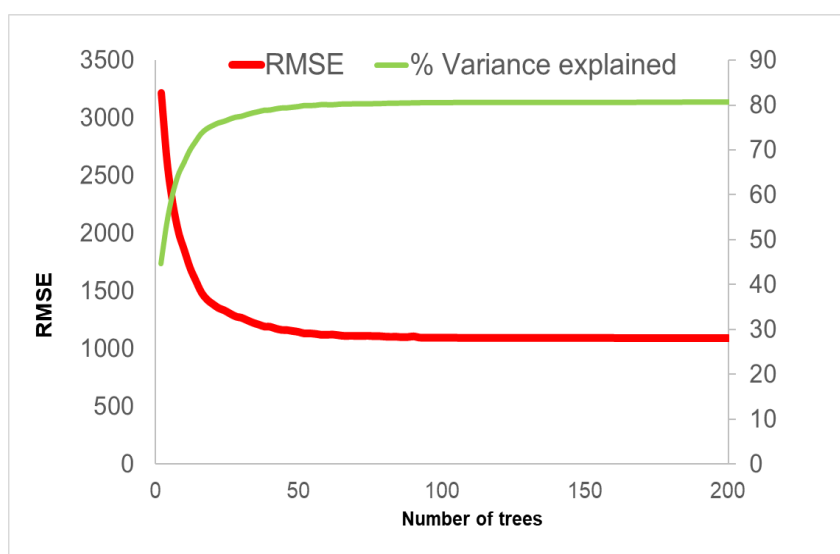

138

139 **Figure S1.** The influence of number of trees on the model performance for  $\text{PM}_{2.5}$

140

141

142

143

144 **Model performance and validation:**

145 A random forest shows a good performance with the correlation ( $r^2$ ) between hourly predicted and  
146 observed data for both training and testing data sets. In particular,  $r^2$  value ranged 0.81-0.83, 0.75-  
147 0.79, 0.80-0.83, 0.88-0.90, 0.85-0.87, and 0.89-0.90 for  $PM_{2.5}$ ,  $PM_{10}$ ,  $NO_2$ ,  $SO_2$ ,  $CO$  and  $O_3$ ,  
148 respectively. Figure S2 shows the hourly correlation between observed and predicted data for a  
149 testing data.

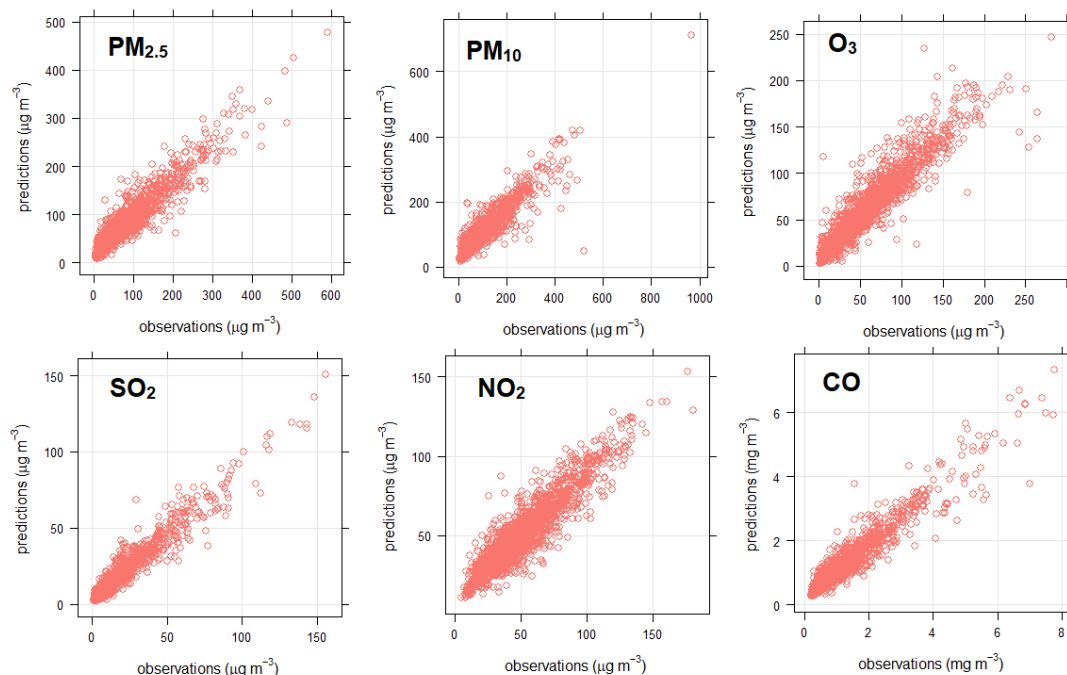

150

151 **Figure S2.** Correlations between daily observed and predicted data from testing data sets  
152

153 As shown in Figure S2, it is likely that the model underestimates hourly concentration of air  
154 pollutants at those extremely high levels. These errors are reduced when we compare the weekly  
155 averaged concentration as shown in Figure S3.

156

157

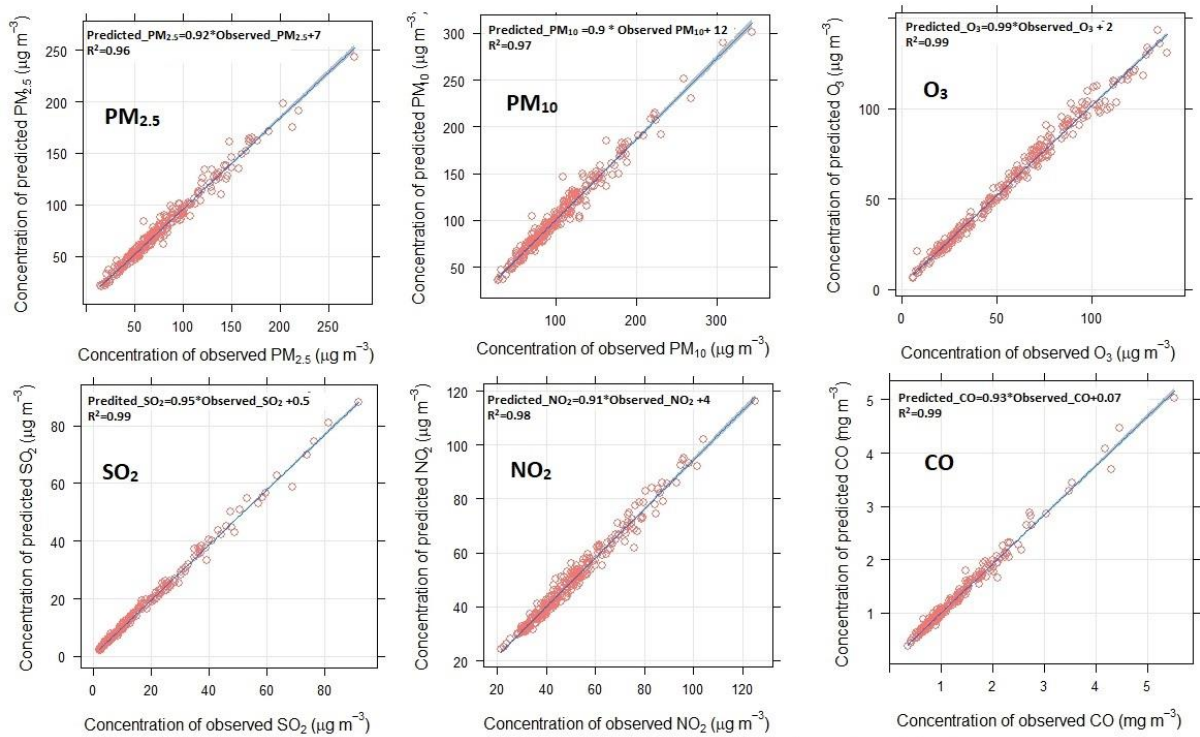

158  
159

160 **Figure S3.** The correlation between observed and modelled concentration is approximately 0.9-  
161 0.99 for weekly averaged data. In our study, a RF forest model was trained using a fraction of 0.7  
162 from the datasets.

163  
164  
165

166 **Variable importance and interactions:**

167  
168

169 As shown in Figure S4, seasonal variations (day\_julian) play the most important variable in the  
170 model, except for ozone when temperature and diurnal pattern (hour) mainly control the predicted  
171 values. The trend (day\_unix) shows more important role in the model of  $\text{SO}_2$  and  $\text{CO}$ , indicating  
172 emission control shows most effectiveness on the decrease of  $\text{SO}_2$  and  $\text{CO}$ . Regarding MET  
173 variable, humidity and temperature play more important role in the model of  $\text{PM}$  while wind speed  
174 has a larger impact in the model of  $\text{NO}_2$ . The variable interaction is shown in Figure S5.  
175



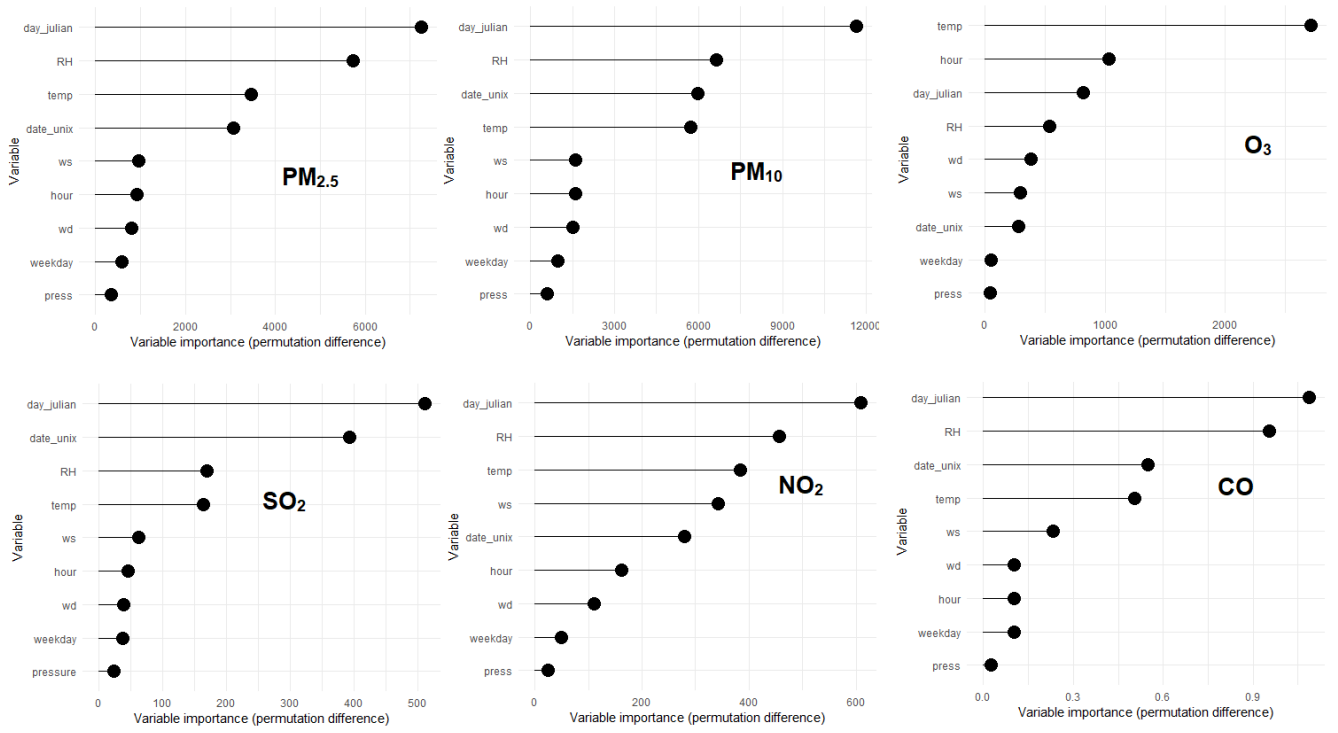

176  
177  
178  
179

Figure S4. Importance of variables in the random forest model

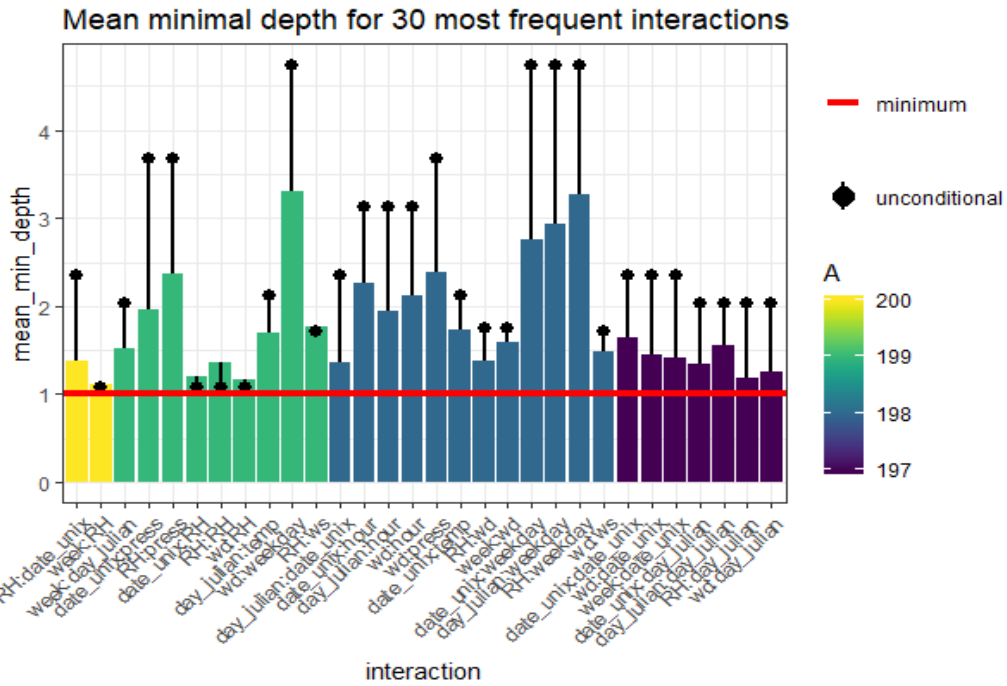

180  
181

Figure S5. Variation interactions in a random forest model for PM<sub>2.5</sub>

182

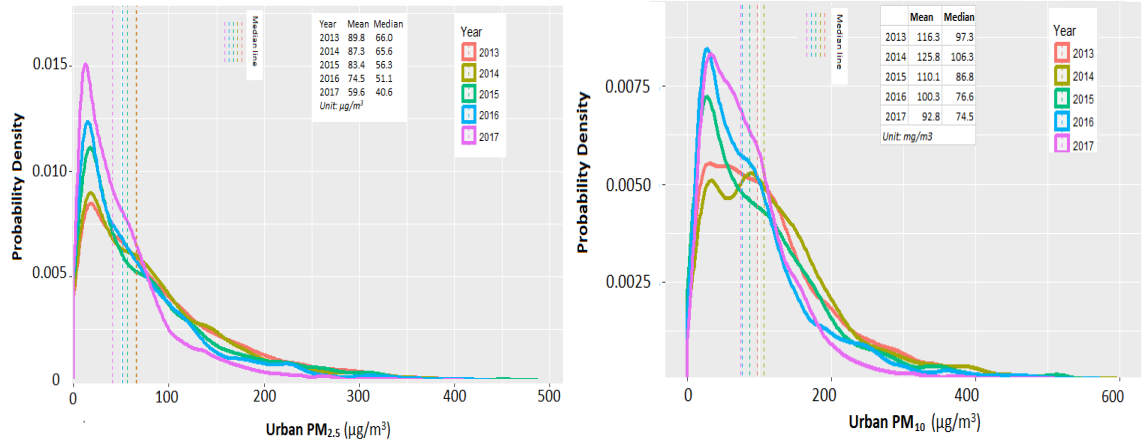

184

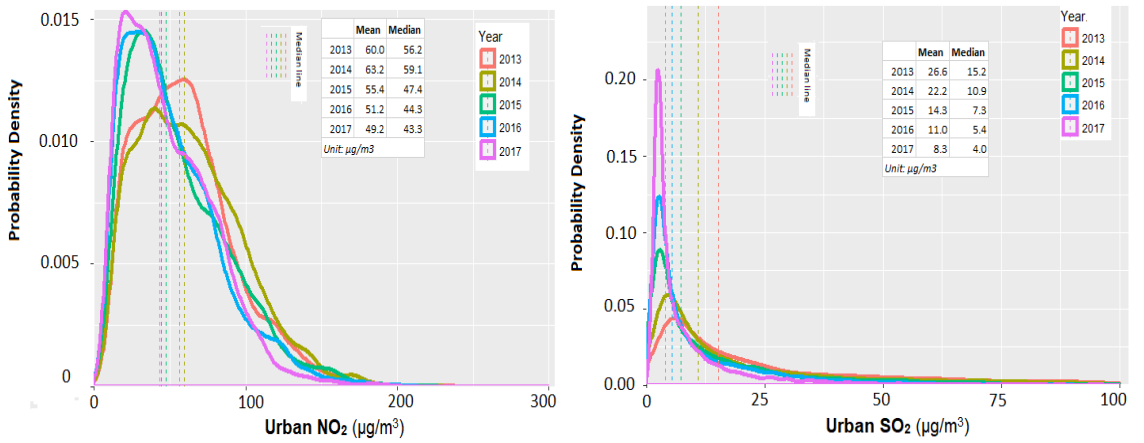

185

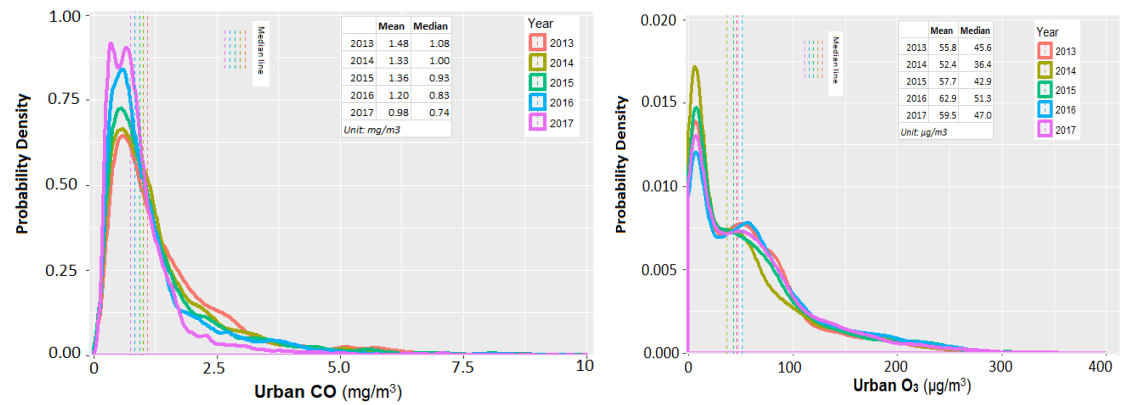

186

187

188

189

190

**Figure S6. Probability density of urban air pollutant concentrations during 2013-2017.**  
 Number of heavy polluted events decrease for all pollutants, except ozone.

191  
192  
193

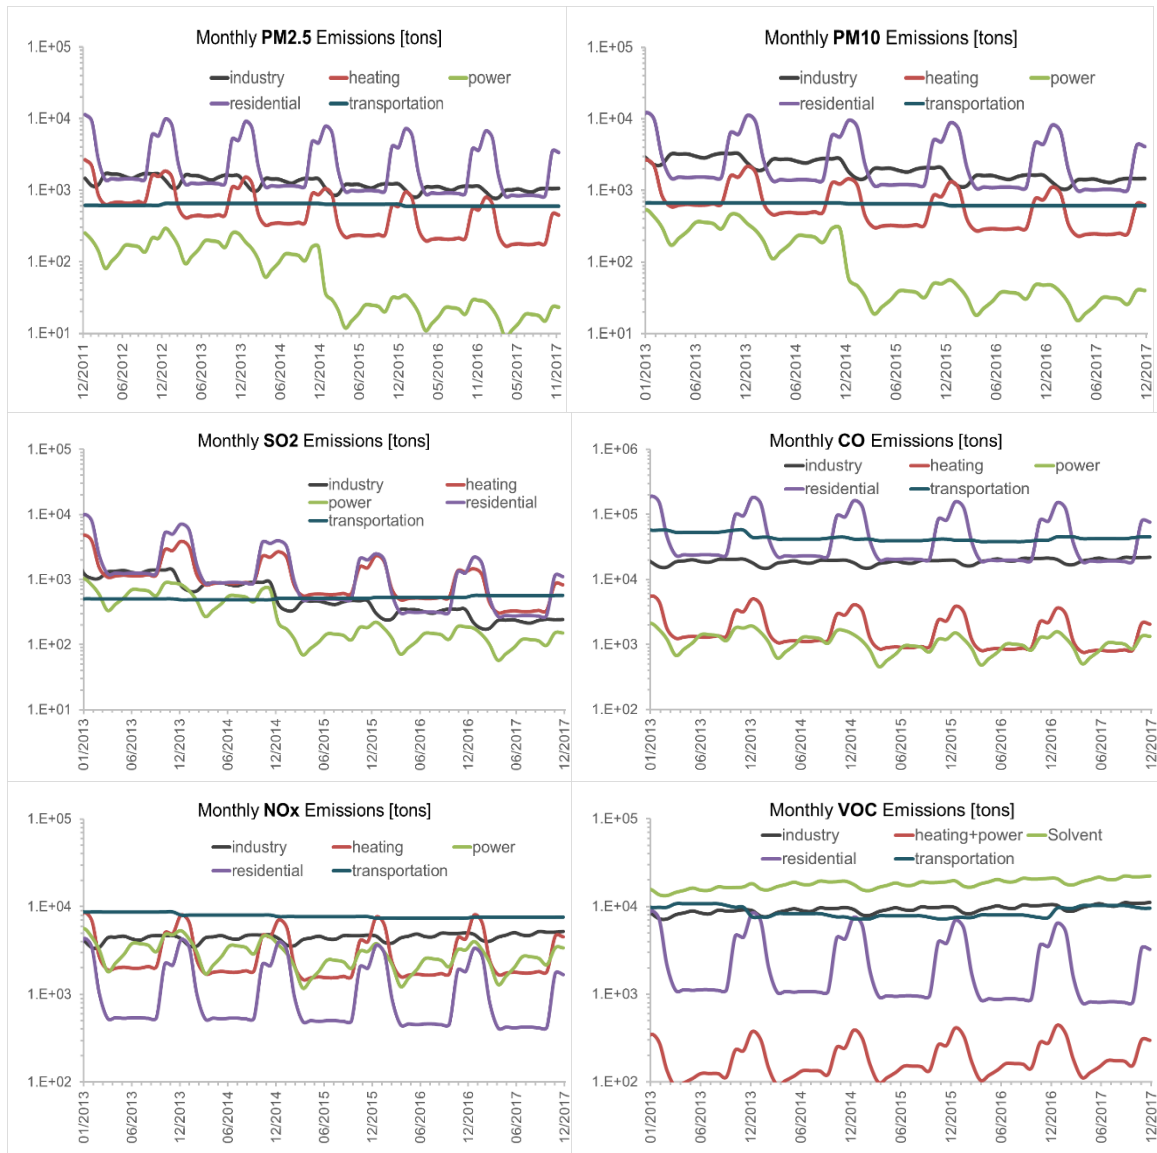

194

195

196

197

198

199

200

201

202

203

204

205

206

207

208

209

**Figure S7. Monthly emission inventories of air pollutants in Beijing during 2013-2017.** The emissions of PM<sub>2.5</sub>, PM<sub>10</sub>, NO<sub>x</sub>, SO<sub>2</sub>, CO in Beijing dropped by 35 %, 44 %, 11 %, 71 %, 17% from 76, 109, 260, 93, 1.7 Gg in 2013 to 49, 61, 231, 27, 1.4 Gg in 2017, respectively. Power sector represents the coal-fired, gas-fired and oil-fired power plants; industry sector includes two subsectors as industrial process and industrial boilers (to offer the mechanical energy ); heating includes both industrial heating (to offer the thermal energy) and domestic heating (refers to centralized heating); residential sources are the urban and rural burning with traditional stoves with coal or biomass fuels; transportation includes both on-road and off-road traffic; solvent use contains all the subsectors which would use solvent during production process, such as paint, ink, pharmaceutical production and household solvent use.

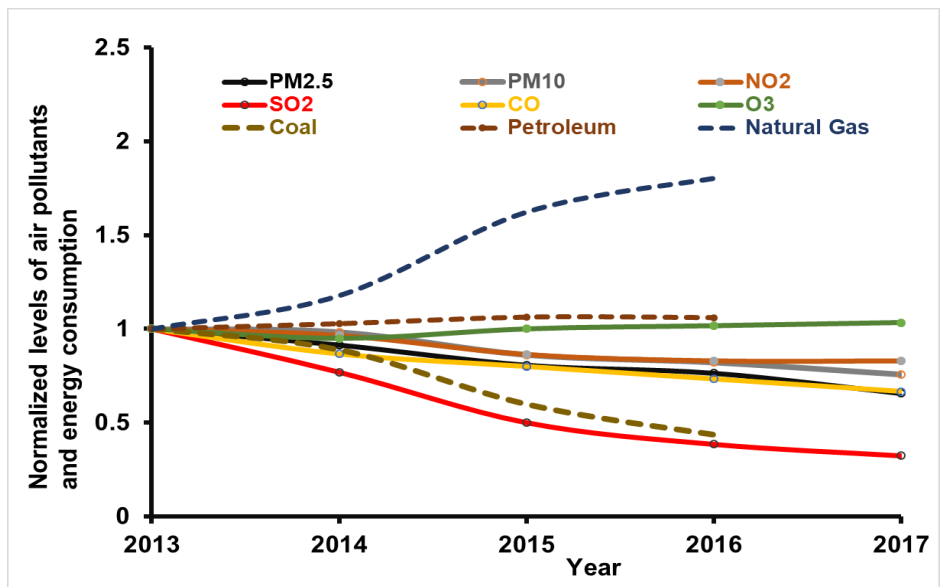

210  
 211  
 212  
 213  
 214  
 215  
 216

**Figure S8. Normalized levels of air pollutants and energy consumption.** The trend of SO<sub>2</sub> was very close to the normalized trend of coal consumption, but showed a faster decrease than trends of PM<sub>2.5</sub> and NO<sub>2</sub>.

217 **Table S1. Air Quality Standards.** China's Air Quality Standards: GB 3095-2012, phase-in 2012-  
 218 2016; WHO Air Quality Guidelines (2005). The Class 2 standards apply to urban areas.  
 219

| Pollutants        | Averaging time         | China standards |         | WHO | unit               |
|-------------------|------------------------|-----------------|---------|-----|--------------------|
|                   |                        | Class 1         | Class 2 |     |                    |
| PM <sub>2.5</sub> | annual                 | 15              | 35      | 10  | µg m <sup>-3</sup> |
|                   | 24 hours               | 35              | 75      | 25  | µg m <sup>-3</sup> |
| PM <sub>10</sub>  | annual                 | 40              | 70      | 20  | µg m <sup>-3</sup> |
|                   | 24 hours               | 50              | 150     | 50  | µg m <sup>-3</sup> |
| NO <sub>2</sub>   | annual                 | 40              | 40      | 40  | µg m <sup>-3</sup> |
|                   | 24 hours               | 80              | 80      | -   | µg m <sup>-3</sup> |
|                   | hourly                 | 200             | 200     | 200 | µg m <sup>-3</sup> |
| SO <sub>2</sub>   | annual                 | 20              | 60      | -   | µg m <sup>-3</sup> |
|                   | 24 hours               | 50              | 150     | 20  | µg m <sup>-3</sup> |
|                   | hourly                 | 150             | 500     | -   | µg m <sup>-3</sup> |
|                   | 10 min                 | -               | -       | 500 | µg m <sup>-3</sup> |
| CO                | annual                 | 4               | 4       | -   | mg m <sup>-3</sup> |
|                   | 24 hours               | 10              | 10      | -   | mg m <sup>-3</sup> |
| O <sub>3</sub>    | 8-hour mean, daily max | 100             | 160     | 100 | µg m <sup>-3</sup> |
|                   | hour                   | 160             | 200     | -   | µg m <sup>-3</sup> |

220  
 221  
 222  
 223
